# Supplementary material for: Electrical and mechanical stability of flexible, organic electrolyte-gated transistors based on iongel and hydrogels
Source: Royal Society of Chemistry journal article supplement (doi:10.1039/d3tc00410d), 2023-01-01
Supplement: d3tc00410d1.pdf [file d3tc00410d1.pdf]

# ARTICLE

## Electrical and mechanical stability of flexible, organic electrolyte-gated transistors based on ion gel and hydrogels

Received 00th January 20xx,  
Accepted 00th January 20xx

Mona Azimi <sup>a</sup>, Arunprabakaran Subramanian <sup>a</sup>, Jiaxin Fan<sup>a</sup>, Francesca Soavi <sup>b</sup> and Fabio Cicoira<sup>\*a</sup>

DOI: 10.1039/x0xx00000x

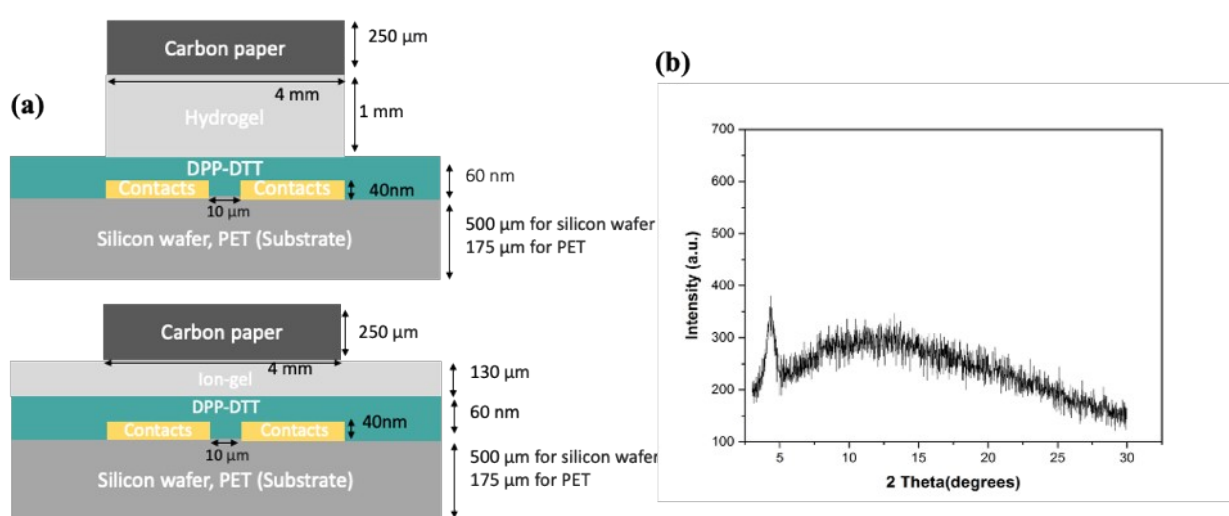

Figure S1. Side view of structure of EGTS (a) using hydrogel gating media (top) and ion-gel gating media (bottom), XRD Pattern of spin coated DPP-DDT film on Si/SiO<sub>2</sub> substrate (b).

<sup>a</sup> Department of Chemical Engineering, Polytechnique Montréal, Montréal, Québec, H3T 1J4, Canada, Email: fabio.cicoira@polymtl.ca

<sup>b</sup> Dipartimento di Chimica "Giacomo Ciamician", Università di Bologna, Via Selmi 2, Bologna 40126, Italy.

Electronic Supplementary Information (ESI) available: [details of any supplementary information available should be included here]. See DOI: 10.1039/x0xx00000x

Table S1. Specific capacitance of reported MIM structures with different electrolytes.

| Gel                                                                      | MIM structure                                                                  | Specific capacitance ( $\mu\text{F cm}^{-2}$ ) | Ref |
|--------------------------------------------------------------------------|--------------------------------------------------------------------------------|------------------------------------------------|-----|
| Biocompatible and biodegradable ionic gel ([CH][MA]:Levan <sup>a</sup> ) | Dry casting of gel on SUS stainless steel coin cell electrode (diameter: 20mm) | 1.39 to 40.0 at 10 Hz                          | 1   |
| [EMIM][TFSI]:PVDF-HFP                                                    | ITO/ion gel/ Al                                                                | 8.39 ( $\pm 0.38$ ) (at 20 Hz)                 | 2   |
| [EMIM][TFSI]:PVDF-HFP                                                    | Au/ion gel/Au                                                                  | $0.167 \pm 0.03 - 4.16 \pm 0.15$ (at 1 KHz)    | 3   |
| [EMIM][TFSI]: SEAS-N3 <sup>b</sup>                                       | Au/ion gel/Au                                                                  | 24                                             | 4   |
| [EMIM][TFSI]:PVDF-HFP                                                    | Au/ion gel/Au                                                                  | $13.26 \pm 1.26 - 21.82 \pm 0.92$              | 5   |

a: [CH]: Choline bicarbonate, [MA]: malic acid, Levan: polysaccharide (matrix)

b: SEAS-N3: Poly[(styrene-r-vinylbenzyl azide)-b-poly(ethyl acrylate)-b-poly(styrene-r-vinylbenzyl azide)]

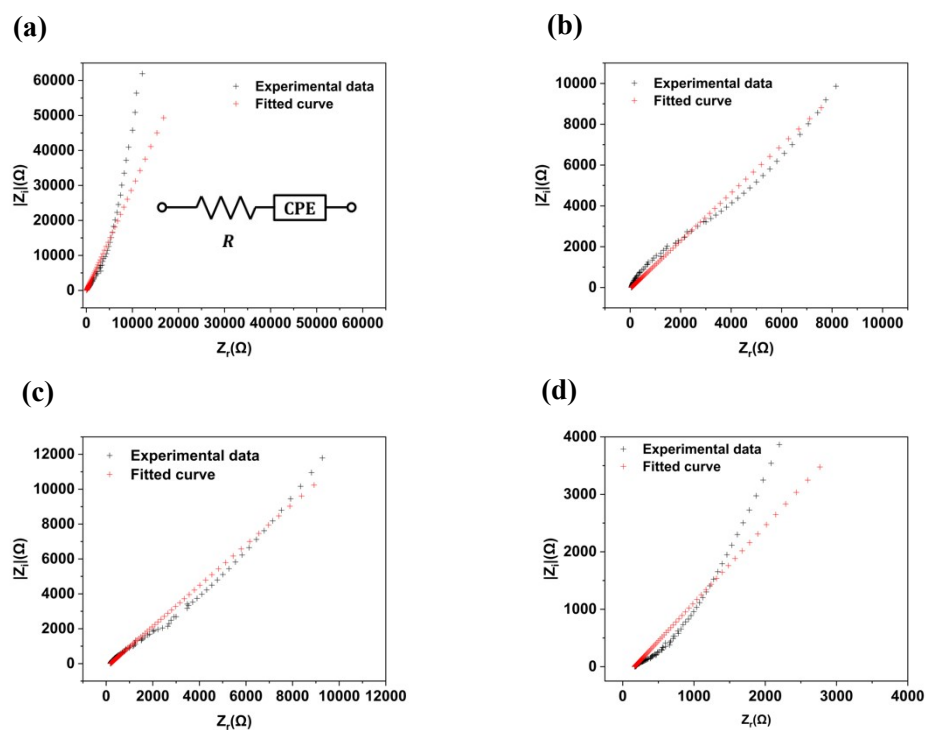

Figure S2. Fitted Nyquist curves (a) for ion-gel (a), PVA/W(0.5) (b), PVA/W+GI (0.5) (c) and PVA/W+GI (0.7) (d). (Inset of figure (a) represents the equivalent circuit use for fitting.

Table S2. Parameters obtained from fitting of equivalent circuit.

| Sample         | $R (\Omega)$ | $CPE (F.s^{(\alpha-1)})$ | $\alpha$ |
|----------------|--------------|--------------------------|----------|
| Ion-gel        | 55           | $3.139e-6$               | 0.82     |
| PVA/W(0.5)     | 50           | $31.41e-6$               | 0.55     |
| PVA/W+GI (0.5) | 180          | $27.03e-6$               | 0.55     |
| PVA/W+GI (0.7) | 166          | $77.75e-6$               | 0.59     |

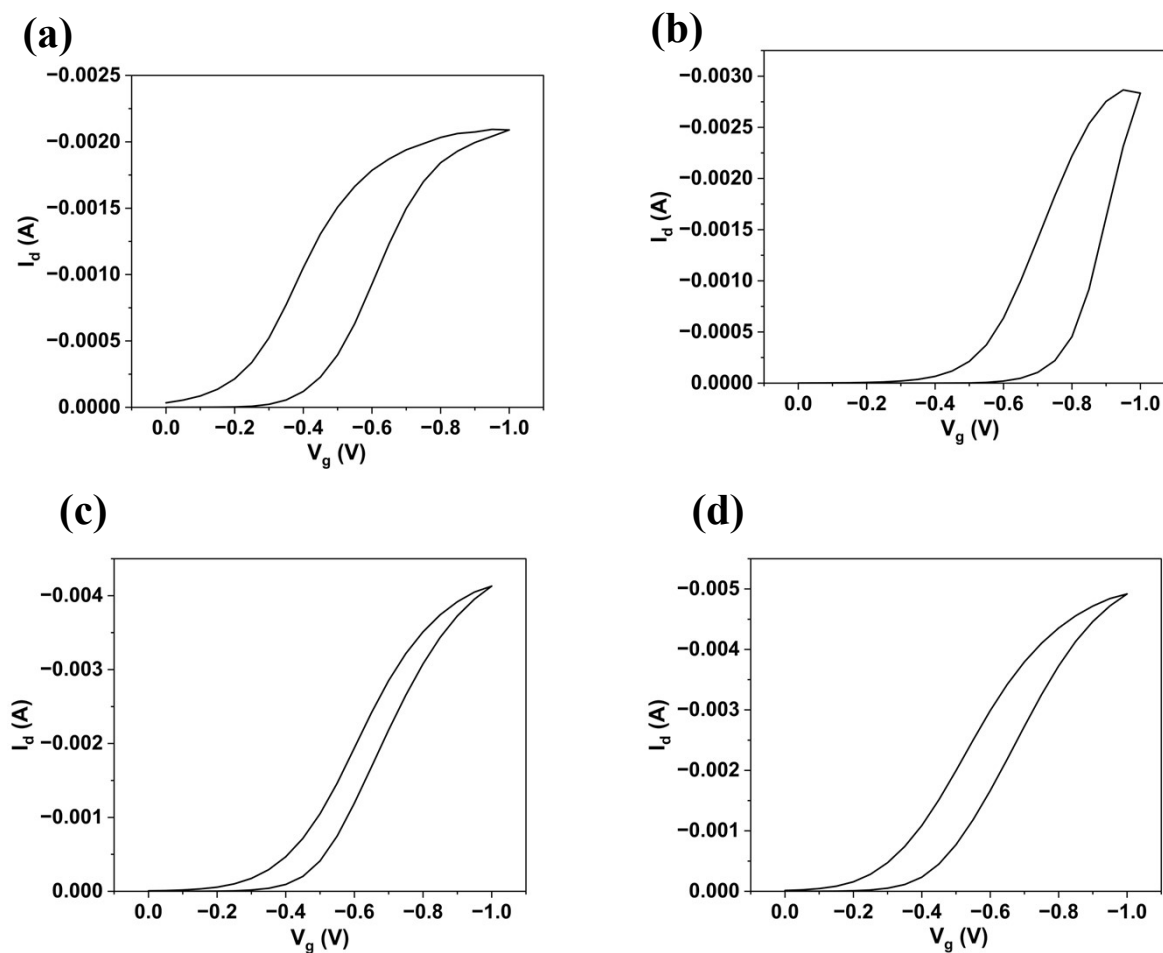

Figure S3. Transfer curves in linear region ( $V_d = -0.2$  V) for PVDF-HFP/IL, PVA/W (0.5), PVA/W+GI (0.5), and PVA/W+GI (0.7) gated transistors (a, b, c, d). Scan rate is  $50 \text{ mV s}^{-1}$ .

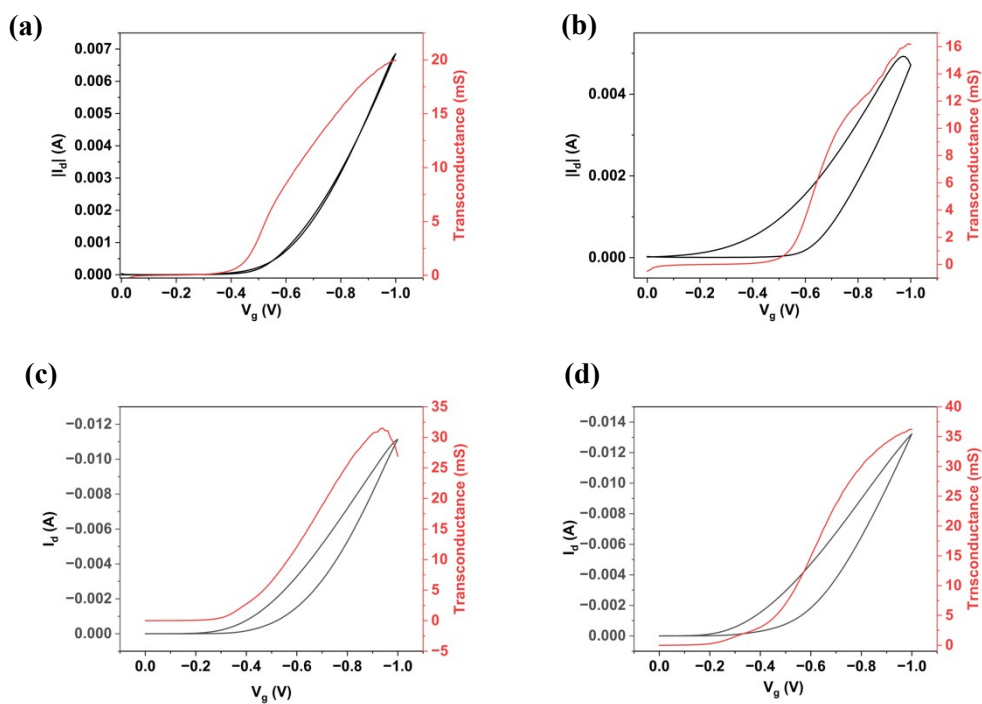

Figure S4. Transfer curves in saturation region ( $V_d = -0.8$  V) for PVDF-HFP/IL, PVA/W (0.5), PVA/W+GI (0.5), and PVA/W+GI (0.7) gated transistors (a, b, c, d) (right Y axis represents transconductance). Scan rate is  $10 \text{ mV s}^{-1}$

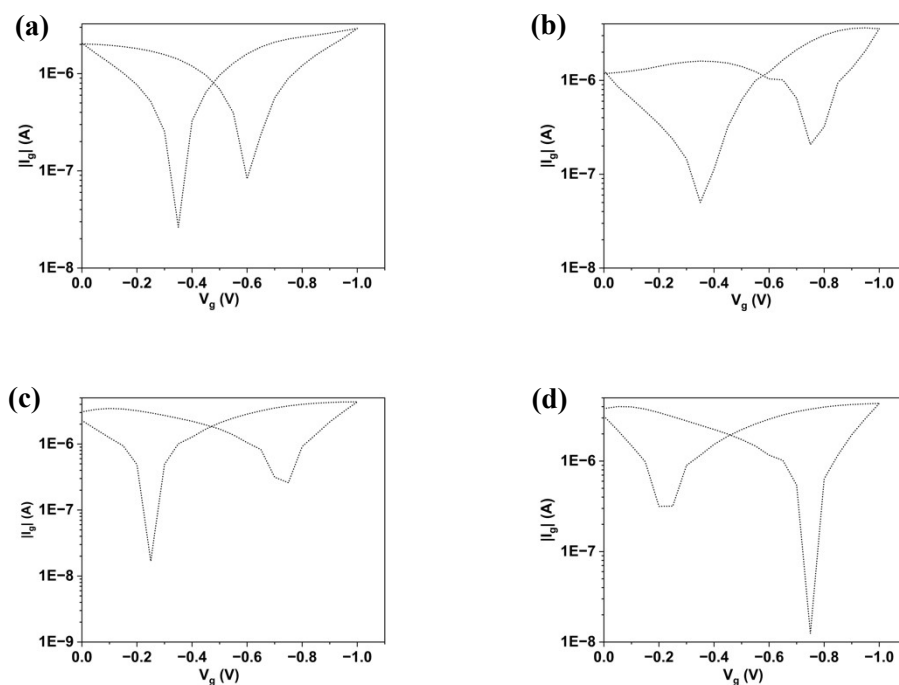

Figure S5. Gate current versus gate voltage for PVDF-HFP/IL, PVA/W (0.5), PVA/W+GI (0.5), and PVA/W+GI (0.7) gated transistors (a, b, c, d).

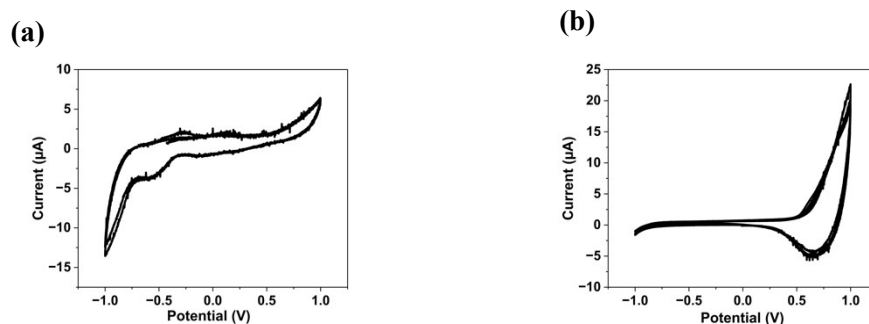

Figure S6. CVs of MIM structure (a), and MIS structure (b).

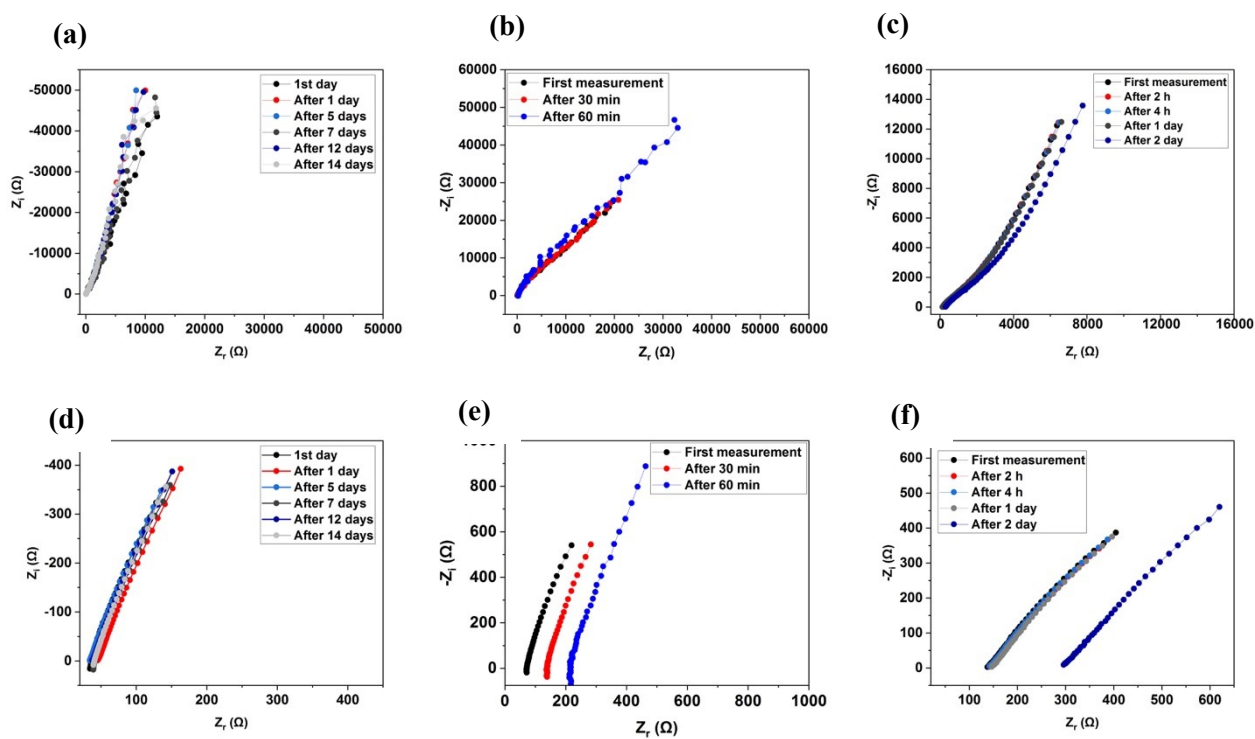

Figure S7. Nyquist curves for MIM structures of PVDF-HFP/IL (a), PVA/W(0.5) (b), , and PVA/W+GI (0.7) (c). Magnified Nyquist plots at high frequencies related to PVDF-HFP/IL (d), PVA/W(0.5) (e), and PVA/W+GI (0.7) (f).

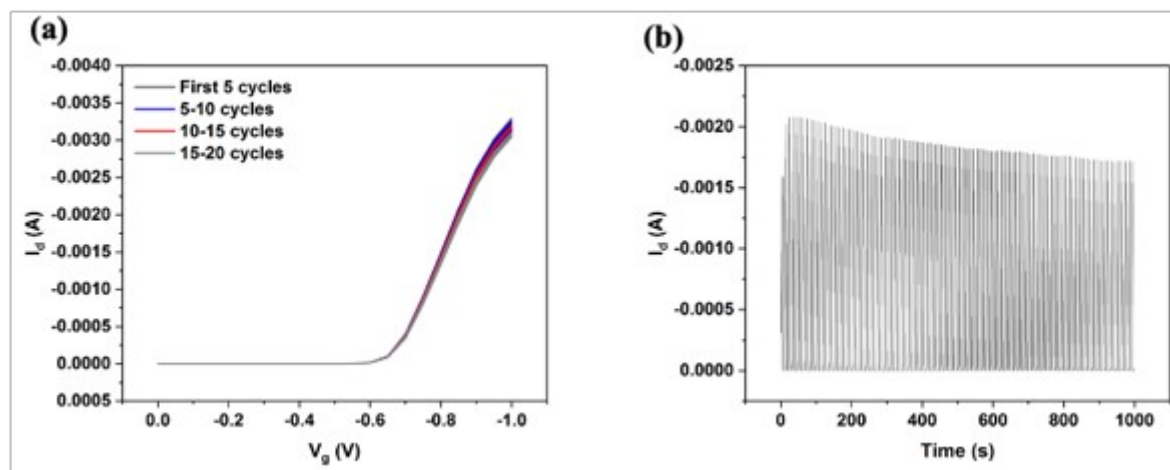

Figure S8. Transfer curves in 20 cycles ( $V_d = -0.2$  V) (a), Pulse measurements with  $V_d = -0.2$  V and square pulse  $V_g$  varied from 0 to  $-0.8$  V (pulse width = 5 s) for PVA/W+GI (0.5) gated transistor (b).

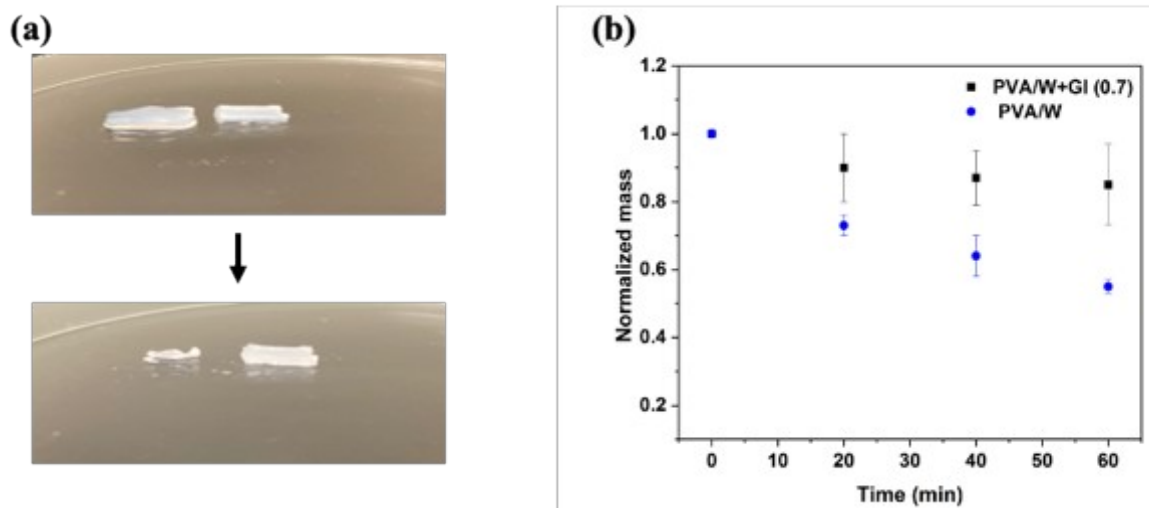

Figure S9. Optical images of PVA/W hydrogel (left) and PVA/W+GI (0.7) hydrogel (right) directly after taking out from saline solution (top) and after 24 hours in ambient (bottom) (a) and normalized mass of two types of hydrogels after removal from the swelling solution during 60 minutes (values measured every 20 minutes).

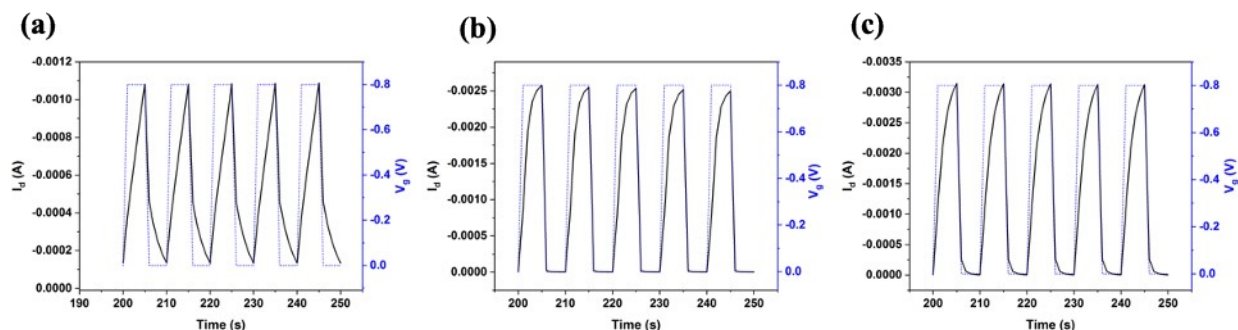

Figure 10. Magnified five cycles of pulse measurements in time scale of 200-250 s for PVDF-HFP/IL (a), PVA/W (0.5) (b) and PVA/W+GI (0.7) (c) gated transistors.

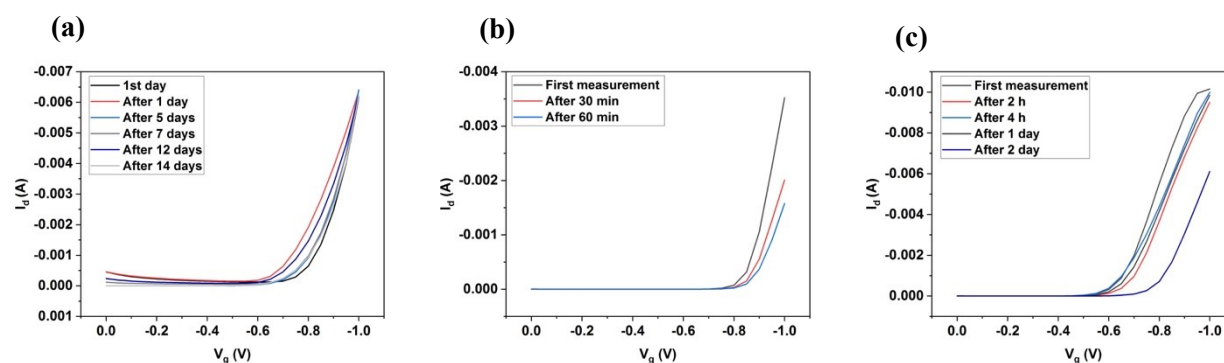

Figure S11: Stability of EGTs for PVDF-HFP/IL (a), PVA/W(0.5) (b), , and PVA/W+GI (0.7) gated transistors (C).

## References

1. Y. J. Jo, H. Kim, J. Ok, Y. J. Shin, J. H. Shin, T. H. Kim, Y. Jung and T. i. Kim, *Advanced Functional Materials*, 2020, **30**, 1909707.
2. Y. Na and F. S. Kim, *Chemistry of Materials*, 2019, **31**, 4759-4768.
3. B. Nketia-Yawson, S. J. Kang, G. D. Tabi, A. Perinot, M. Caironi, A. Facchetti and Y. Y. Noh, *Advanced Materials*, 2017, **29**, 1605685.
4. F. Zare Bidoky, B. Tang, R. Ma, K. S. Jochem, W. J. Hyun, D. Song, S. J. Koester, T. P. Lodge and C. D. Frisbie, *Advanced Functional Materials*, 2020, **30**, 1902028.
5. B. Nketia-Yawson, G. D. Tabi and Y.-Y. Noh, *ACS Applied Materials & Interfaces*, 2019, **11**, 17610-17616.
